# Supplementary material
Source: bioRxiv or medRxiv preprint supplement (https://www.biorxiv.org/highwire/filestream/3441/field_highwire_adjunct_files/14/013631-8.pdf)

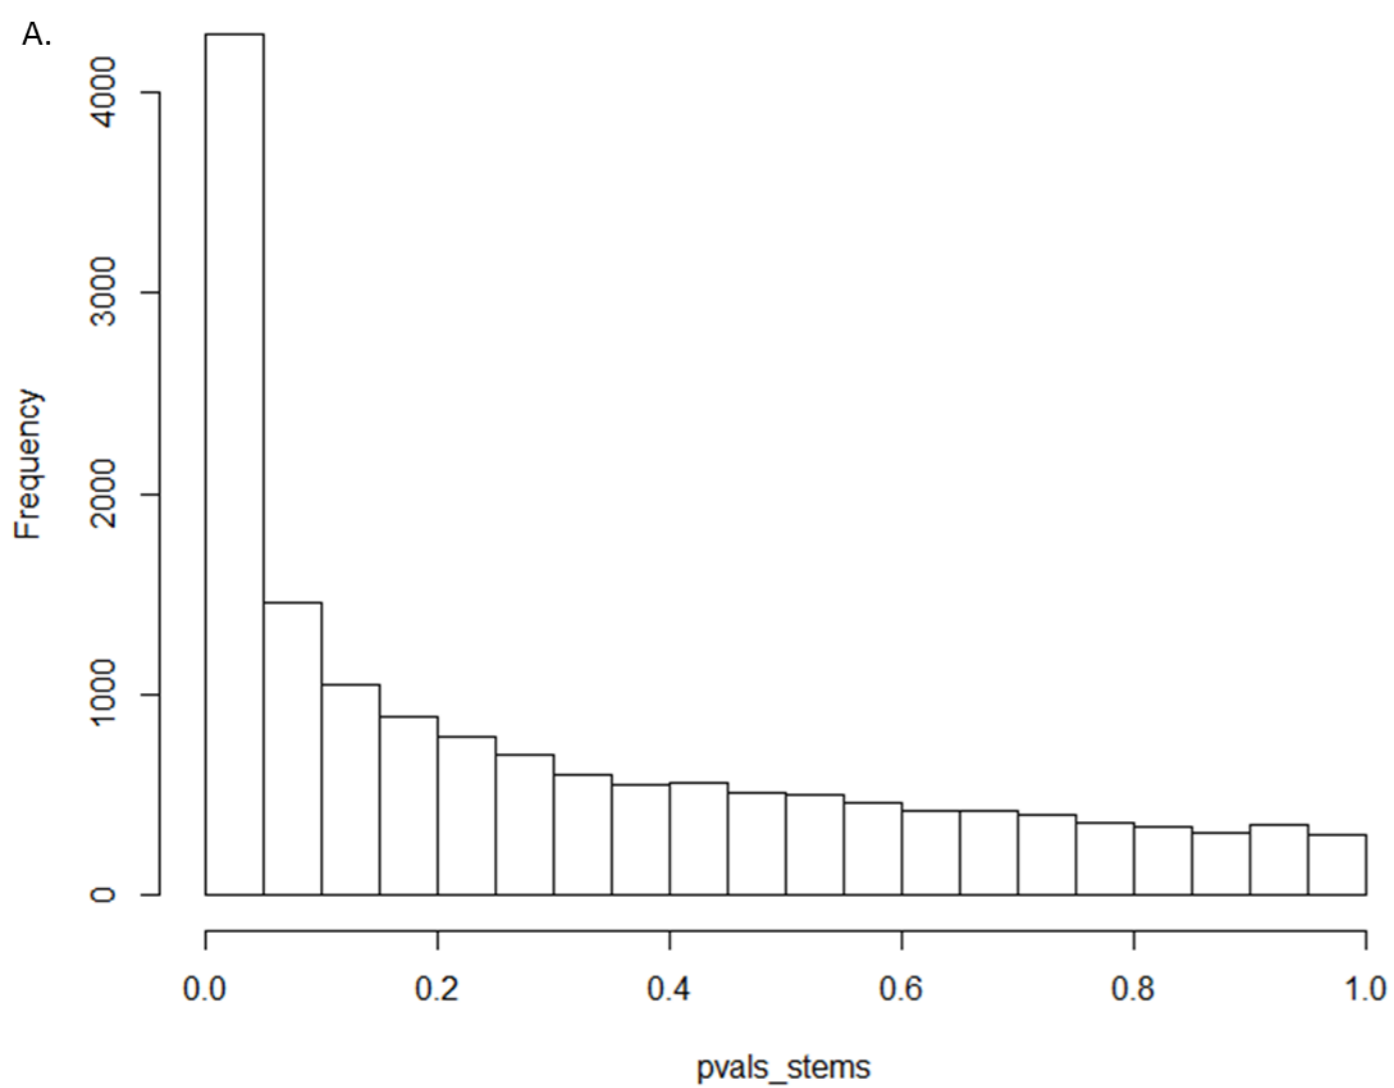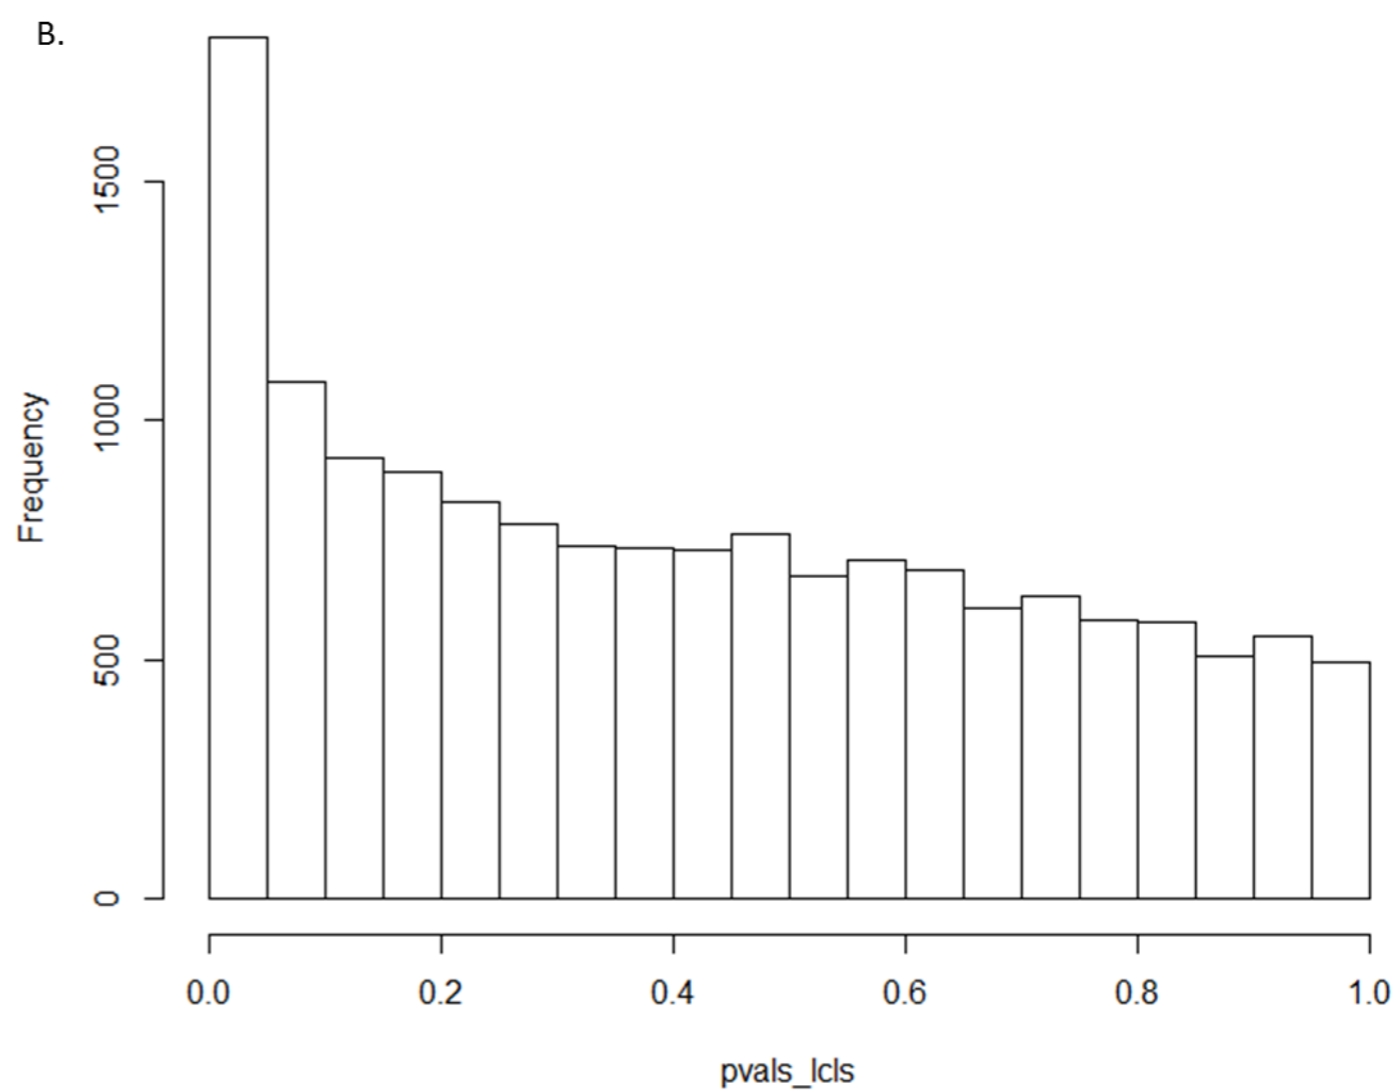

Supplement: Supplementary file [file 013631-8.pdf]
